# 1 **A bite force database of 654 insect species**

## 2 **Authors**

3 Peter Thomas Rühr, Carina Edel, Melina Frenzel, Alexander Blanke

4

## 5 **Affiliation**

6 Institute of Evolutionary Biology and Animal Ecology, University of Bonn, An der Immenburg

7 1, 53121 Bonn, Germany

8

9 corresponding author: Peter T. Rühr ([ruehr@uni-bonn.de](mailto:ruehr@uni-bonn.de))

## 10 **Abstract**

11 Bite force is a decisive performance trait in animals because it plays a role for numerous life  
12 history components such as food consumption, inter- and intraspecific interactions, and  
13 reproductive success. Bite force has been studied across a wide range of vertebrate species,  
14 but only for 20 species of insects, the most speciose animal lineage. Here we present the insect  
15 bite force database with bite force measurements for 654 insect species covering 111 families  
16 and 13 orders with body lengths ranging from 4.2 - 180.1 mm. In total we recorded 1906 bite  
17 force series from 1290 specimens, and, in addition, present basal head, body, and wing  
18 metrics. As such, the database will facilitate a wide range of studies on the characteristics,  
19 predictors, and macroevolution of bite force in the largest clade of the animal kingdom and  
20 may serve as a basis to further our understanding of macroevolutionary processes in relation  
21 to bite force across all biting metazoans.

22

## 23 **Background & Summary**

24 Bite force is a performance trait which may decide on an animal's ability to acquire food, win  
25 inter- and intra-specific fights and successfully reproduce<sup>1-5</sup>. In vertebrates, maximum bite  
26 forces are well studied across a wide diversity of taxa such as bony fishes<sup>6,7</sup>, crocodylians (e.g.  
27 <sup>8</sup>), birds (e.g. <sup>9</sup>), turtles (e.g. <sup>10</sup>), squamates (e.g. <sup>11,12</sup>), frogs<sup>13</sup>, marsupials<sup>14</sup>, and mammals (e.g.  
28 <sup>15-18</sup>).

29 Fundamental knowledge on the variation, predictors and evolution of bite forces within the  
30 omnipresent insects is, however, lacking. Even though more than half a million insect species  
31 belong to orders that possess biting-chewing mouthparts<sup>19,20</sup>, existing literature only yields  
32 bite force measurements on five dragonflies<sup>21,22</sup>, one cockroach<sup>23</sup>, and 14 beetles<sup>24,25</sup>. This is  
33 despite the fact that biting-chewing insects include the most destructive plant eating animals  
34 and occupy crucial roles in the world's ecosystems as soil-building detritivores<sup>26</sup>.

35 So far, measuring bite forces of insects was hampered by their small size, but the recently  
36 published measurement setup "forceX" <sup>27</sup> overcame this limitation to some extent by allowing  
37 minimally invasive *in vivo* bite force measurements of animals with gape sizes more than ten  
38 times smaller than previous setups (e.g. <sup>28</sup>). Using forceX, we measured bite forces of 654  
39 insect species from 111 families and 13 orders, collected on four continents and from  
40 numerous breeding cultures. Instead of gathering maximum force values only, as most  
41 previous bite force studies have done (but see <sup>25,23,21,22,29</sup>), we also recorded force curves. In  
42 addition, the bite force database contains head, wing and body metrics of each specimen to  
43 assess morphological predictors for bite force in insects. Thus, the database will facilitate  
44 investigations on the macroevolution of maximum bite force, bite lengths, bite frequencies,  
45 muscle activation patterns, and bite curve shapes across the megadiverse insects and will  
46 facilitate comparisons with all biting metazoan taxa.

## 47 **Methods**

### 48 **Collection and material**

49 A total of 1290 insect specimens representing 654 species from 111 families and 13 orders  
50 were collected in Australia, China, Denmark, France, Germany, Greece, Panama and Slovenia  
51 using light traps, insect nets, pitfall traps, or directly by hand. All specimens were collected  
52 under the respective regulations in effect (see Acknowledgements). Additionally, we  
53 measured specimens from numerous scientific, private and commercial insect breeders and  
54 traders (Online-only Table 1 and Acknowledgements).

### 55 **Size measurements**

56 Head width, head length, head height, thorax width, forewing length and body length  
57 measurements were performed to the nearest 0.01 mm using a digital caliper (77001,  
58 Wentronic GmbH, Braunschweig, Germany). For the head width, the longest distance from left  
59 to right was measured, including protruding eyes if applicable (Fig. 1a). Head height in  
60 orthognathous insects was measured from the clypeo-labral ridge to the dorsal end of the  
61 head (Fig. 1a,b). In prognathous insects, head length was measured from the clypeo-labral  
62 ridge to the posterior end of the head (Fig. 1c). Thorax width was measured on the prothorax  
63 (Fig. 1d) and excluded lateral protrusions as found e.g. in many cockroaches and praying  
64 mantises. Body length measurements excluded cerci, ovipositors, or other abdominal  
65 appendages (Fig. 1e).

### 66 **Bite force measurements**

67 All measurements were carried out with the metal-turned version of the forceX setup as  
68 described in <sup>27</sup>. In short, life and conscious animals were held between two fingers, rotated by  
69 90° along their body axis and allowed to voluntarily bite on the tip elements of the forceX.

70 Different tip element designs<sup>27</sup> and distances between them were used to accommodate  
71 different animal gape sizes. During measurements, animals were observed through the Junior  
72 Stereo 3D microscope (Bresser GmbH, Rhede, Germany) that is part of the forceX setup to  
73 ensure that gape sizes are suitable and that the insects bite at the edge of the tip elements so  
74 that the ratio of the forceX lever remains at a constant 0.538<sup>27,30</sup>. We also checked if the  
75 animals bit with the distal-most incisivi of their mandibles to ensure that measurements  
76 remain comparable<sup>30</sup>. Non-distal bites or wrongly placed bites on the tip elements were  
77 discarded. If animals did not start biting by themselves, we used the tip element protrusions  
78 to insert the tip elements between the mandibles and/or used a fine brush to touch the  
79 animal's cerci, head or abdomen<sup>23</sup>. Amplified analogue voltage signals were converted to a  
80 digital signal by a 12-bit USB data acquisition device (U3-HV, LabJack Corporation, Lakewood,  
81 Colorado, US) and recorded with the LJStreamUD v1.19 measurement software (LabJack  
82 Corporation) on a computer.

### 83 Data curation

84 Subsequent data curation was performed in the software environment 'R' v.4.03<sup>31</sup> using the  
85 package 'forceR' v.1.0.0<sup>27</sup>. Since the forceR package was written to analyse data generated  
86 with the forceX setup, we used, if not stated otherwise, the default settings of the package  
87 functions. First, time series were converted from the output format of LJStreamUD to a \*.csv  
88 file containing only a time and a voltage column (without changing measurement values) using  
89 the forceR function 'convert\_measurement()'. Then, all measurements were manually  
90 cropped using 'crop\_measurement()' to exclude regions without bite data at the beginning  
91 and end of each measurement. Next, 'amp\_drift\_corr()' was used to correct for the logarithmic  
92 drift of the analogue charge amplifier (see Rühr and Blanke<sup>27</sup> for details). When using the high  
93 amplification setting (20 V/N) to amplify the miniscule voltage signals of the piezoelectric force  
94 transducer at small bite forces, the zero-voltage-line ('baseline') may drift notably during a

95 measurement. Therefore, a PDF file depicting all input raw data and their amplifier drift-  
96 corrected data graphs (available at Zenodo, s. Data Records) was visually inspected, and, if  
97 necessary, the function 'baseline\_corr()' was used in its automatic mode to correct for this  
98 drift. In some of these cases, however, especially when the test animals showed long, plateau-  
99 like bite curve shapes, the automatic mode of 'baseline\_corr()' failed to find the baseline, and  
100 the manual mode was used. All corrections can be retraced in the PDF file and reproduced  
101 using the log files that were created during corrections and which are stored at Zenodo. With  
102 the function 'reduce\_frq()' we then reduced the sampling rate of all time series to 200 Hz, a  
103 value found to be sufficient to represent insect bite force curves<sup>25,23,22,22</sup> to reduce the amount  
104 of data for further analyses. As a last curating step, voltage values were converted into force  
105 data [N] with the forceR function 'y\_to\_force()' that considers the amplification level of each  
106 measurement and the lever mechanics of the measurement system. Online-only Table 1  
107 shows all measurement settings, taxonomic classifications and information on which  
108 correction procedures have been performed on which measurements.

## 109 Maximum force value extraction for specimens and species

110 To extract maximum force values of each specimen and each species and calculate the  
111 standard deviations of these values we used the function 'summarize\_measurements()' of  
112 forceR and custom code, heavily on the packages 'dplyr' v.1.0.7<sup>32</sup>. We then plotted the log10-  
113 transformed average maximum bite force per specimen (grey dots in Fig. 2) and per species  
114 (black dots) against the log10-transformed average body length (Fig. 2a) and head width (Fig.  
115 2b) using 'ggplot2' v.3.3.5<sup>33</sup> and 'ggExtra' v.0.9<sup>34</sup>. Linear regressions through the log10-  
116 transformed species-wise data showed significant allometric relationships between body size  
117 and head width ( $p < 0.001$ ) with explanatory values of  $r^2 = 0.43$  and  $r^2 = 0.56$ , respectively. Due  
118 to the expected logarithmic relationship between size and bite force<sup>35</sup>, means were

119 calculated as geometric means. Calculations with the regular mean, however, yielded similar  
120 results ( $p < 0.001$ ,  $r^2 = 0.44$  and  $r^2 = 0.56$ ; Supplementary Figure 1).

## 121 Comparison to previous insect bite force measurements

122 Previous studies on insect bite forces covered maximum bite force values for 20  
123 species<sup>24,23,21,22</sup>. To check if these measurements follow similar allometric slopes as our data,  
124 we extracted all available insect bite force data from the literature and added them to the  
125 scatterplot in Figure 2b. We then tested if our data and the literature data differ in their  
126 allometric slopes by comparing a linear model with the null hypothesis of different slopes  
127 ( $\log_{10}(\text{bite.force}) \sim \log_{10}(\text{head.width}) * \text{source}$ ) versus a linear model with the null hypothesis  
128 of common slopes ( $\log_{10}(\text{bite.force}) \sim \log_{10}(\text{head.width}) + \text{source}$ ). Both model fits were  
129 compared with an ANOVA to find out if they differ significantly.

## 130 Assessment of geographical coverage

131 Climate zone data (Köppen–Geiger classification system<sup>36–38</sup>) was gathered for each species  
132 based on the GPS coordinates of its collection localities (Online-only Table 1) with the function  
133 ‘LookupCZ()’ of the R package ‘kgc’ v.1.0.0.2<sup>39</sup>. Percentages of species in the database for each  
134 country and climate zone were calculated.

## 135 Assessment of phylogenetic coverage

136 To assess the phylogenetic coverage of the bite force database we compared the number of  
137 species with database entries to the number of species listed by the Open Tree of Life<sup>40</sup>,  
138 accessed on 2022/02/05 with the function ‘tol\_node\_info()’ of the package ‘rotl’ v.3.0.11<sup>41</sup>.  
139 Comparisons were carried out for all insect orders and families that are present in the bite  
140 force database.

## 141 **Data Records**

142 All raw measurements, the cleaned time series, and the PDF and log files created during the  
143 conversion of the raw data to the final database are available in comma-separated format at  
144 Zenodo: <https://doi.org/10.5281/zenodo.5782922>). Online-only table 1 is also stored in the  
145 same repository.

## 146 **Technical Validation**

147 Visual inspection of the scatter plot of bite force against head width (black dots in Fig. 2b) and  
148 all literature data points (orange diamonds) revealed that the literature data lies close to the  
149 regression through all data points of our database. This impression is corroborated by the  
150 comparison of the allometric slopes of the insect bite force database and the literature data,  
151 which yielded no statistically significant difference (ANOVA:  $F = 0.102$ ,  $p = 0.75$ ).

152 Geographical assessment of the collected animals showed that most species of the insect bite  
153 force database were collected in Australia (30.7%), Germany (19.1%), and Panama (16.4%).  
154 23.2% of the species were obtained from breeding cultures. The remaining 10.6% of the  
155 species were collected in Greece, Slovenia, France, China, and Denmark. Climate region  
156 assessment revealed that most species were collected in temperate (54%) and tropical (43.2%)  
157 regions. 2.8% came from dry and continental regions combined (Fig. 3b). We did not consider  
158 the original geographic distribution of those species obtained from breeding cultures.

159 A total of 13 biting-chewing insect orders are present in the database (Fig. 3d). We could not  
160 obtain live animals from the orders Zoraptera and Grylloblattodea. Bite force measurements  
161 of the few species of Plecoptera, Mecoptera, and Trichoptera that were available failed  
162 because no voluntary biting could be elicited in these specimens. We did not attempt  
163 measuring available representatives of Psocoptera and the biting-chewing “mandibulate  
164 archaic moths” (Lepidoptera: Micropterigoidea) due to their minute size. The assessment of



165 phylogenetic coverage of the orders and families showed that most families are represented  
166 by less than one species entry per 100 estimated species (Fig. 3c). While orders were sampled  
167 in proportion to their taxonomic diversity (Fig. 3d), we were only able to measure at least 1%  
168 of the described species in Mantophasmatodea, Phasmatodea and Mantodea (dots left of  
169 dashed line in Fig. 3a). Accordingly, bite forces of only a fraction of all insect species were  
170 measured so far. Nevertheless, the database exceeds all previous studies combined in species  
171 numbers (30-fold in insects, 3.5-fold in amniotes), marking just the beginning of research on  
172 this performance trait in the most species-ridge metazoan clade.

## 173 **Usage Notes**

174 The forceR package<sup>27</sup> was used to create the insect bite force database, which contains  
175 cleaned measurement time series and maximum bite forces of insects. The same package may  
176 be used to expand the scarce knowledge on insect bite forces by tackling questions regarding  
177 the evolution of bite lengths, frequencies, and bite curve shapes by semi-automatically  
178 extracting individual bite curves from these measurements. Additionally, the maximum bite  
179 force values presented in Online-only table 1 can be used for a wide range of in-depth studies  
180 on the morphological and ecological predictors and macroevolution of this important  
181 performance trait in the megadiverse insects.

## 182 **Code Availability**

183 The R code to convert the raw measurements into the final database and to create all tables  
184 and figures used in this publication can be found at [https://github.com/Peter-T-  
185 Ruehr/Insect\\_Bite\\_Force\\_Database](https://github.com/Peter-T-Ruehr/Insect_Bite_Force_Database).

## 186 **Acknowledgements**

187 We would like to express our deep gratitude to the numerous people that helped in collecting  
188 (J. Dorey (Flinders University, Adelaide, Australia), E. P. Fagan-Jeffries (University of Adelaide,  
189 Adelaide, Australia), L. R. Beische, M. Bläser, R. Predel (University of Cologne, Cologne,  
190 Germany), A. M. Jansen, L. Hamann (University of Bonn, Bonn, German), M. Giannotta  
191 (Australian National University, Adelaide, Australia), Sam Finnie (University of South Bohemia,  
192 Ceske Budejovice, Czech Republic) J. Hamann (Refrath, Germany) and identifying (T. Frenzel  
193 (University of Koblenz - Landau, Koblenz, Germany), J. Dorey (Flinders University, Adelaide,  
194 Australia), D. C. F. Rentz (James Cook University Cairns Campus, Cairns, Australia), S. You Ning,  
195 J. Rodriguez Arrieta (Australian National Insect Collection, Canberra, Australia), E. P. Fagan-  
196 Jeffries (University of Adelaide, Adelaide, Australia), M. Giannotta, Y. Living' Li (Australian  
197 National University, Adelaide, Australia), A. Richter (Friedrich-Schiller-Universität Jena, Jena,  
198 Germany)) many of the animals used in this study. R. Plarre (Bundesanstalt für  
199 Materialforschung und -prüfung (BAM), Berlin, Germany), L. R. Beische, M. Bläser, R. Predel,  
200 T. Weihmann (University of Cologne, Cologne, Germany), S. Büsse (Kiel University, Kiel,  
201 Germany), W. Hickler (Gelsenkirchen, Germany), C. J. Schwarz (Bochum, Germany), M.  
202 Sebesta (Antstore, Berlin, Germany) and B. and D. Drenske (AntsNature, Berlin, Germany) are  
203 thanked for providing life animals from their breeding cultures and/or collection trips free of  
204 charge. Collections in Australia were carried out at the Daintree Rainforest Observatory (James  
205 Cook University, Australia) and under the permit number PTU19-002400 of the Queensland  
206 Parks and Wildlife Service. PTR, MF and AB were supported by the European Research Council  
207 (ERC) under the European Union's Horizon 2020 research and innovation program (grant  
208 agreement no. 754290, 'Mech-Evo-Insect'). AB and CE were supported by the Deutsche  
209 Forschungsgemeinschaft (DFG) under the Individual Research Grants program (grant  
210 agreement no. BL 1355/4-1).

211 **Author contributions**

212 PTR wrote all code, prepared the figures, lead the dataset creation and drafted the manuscript.

213 PTR and AB conceived the study and refined the manuscript. CE, MF and AB contributed to the

214 dataset creation. All authors reviewed the manuscript and gave final approval for publication.

215 **Competing interests**

216 The authors declare no competing interests.

217

218 **Figures**

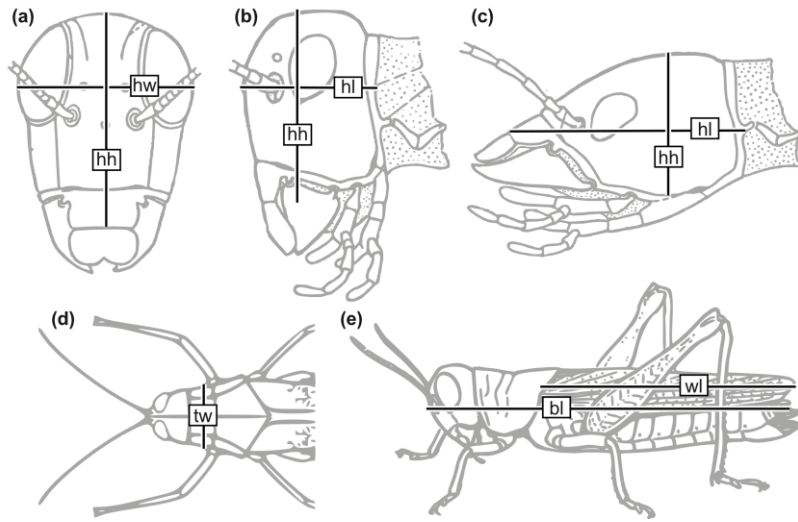

219

220 **Fig. 1:** Insect length measurements. **(a-b)** Head of an orthognathous insect in frontal (a) and

221 lateral view (b). **(c)** Head of prognathous insect in lateral view. **(d)** Frontal part of an

222 orthognathous insect in dorsal view. **(e)** Orthognathous insect habitus in lateral view.

223 Abbreviations: **bl**, body length; **hh**, head height; **hl**, head length; **hw**, head width; **wt**, thorax

224 width; **wl**, forewing length. a,b,c after Snodgrass<sup>42</sup>; e after Snodgrass<sup>43</sup>.

225

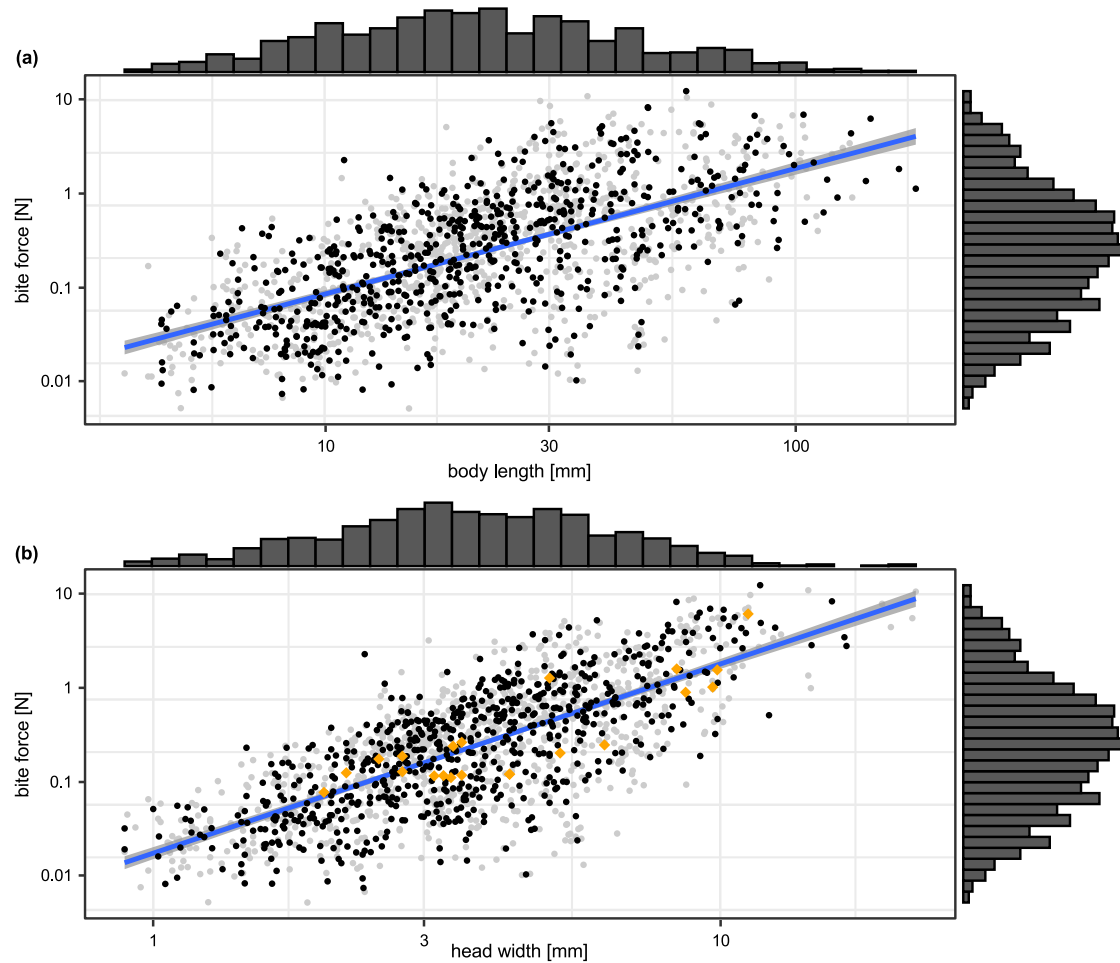

226

227 **Fig. 2:** Maximum bite force against body length (a) and head width (b). Grey dots show  
228 geometric means of all maximum bite forces per specimen, black dots show geometric means  
229 of all length measurements and maximum bite forces of all specimens per species. Marginal  
230 histograms at the x- and y-axes show mean size and mean bite force distribution per specimen,  
231 respectively. Regression lines and coefficients refer to log<sub>10</sub>-linear models of species-wise bite  
232 force against body length (a) or head width (b). Orange diamonds in (b) show bite force  
233 measurements available in previous literature. All axes are log<sub>10</sub>-transformed.

234

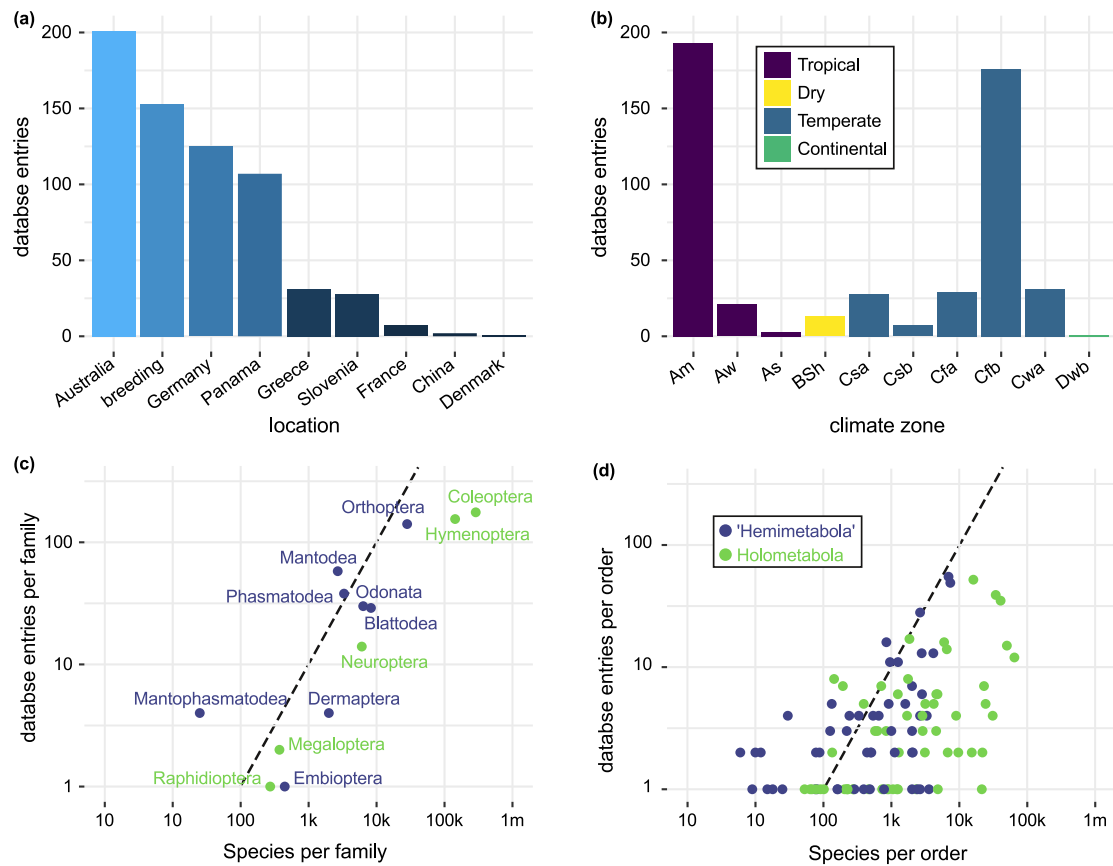

235

236 **Fig. 3:** Geographical and phylogenetic coverage of the bite force database. **(a)** Species entries

237 per collection location (country or breeding). **(b)** Species entries per Köppen–Geiger climate

238 zone with specimens sourced from breeding cultures excluded. **(c)** Ratio of database entries

239 compared to species estimated in all insect families present in the database. **(d)** Ratio of

240 database entries compared to species estimated in all insect orders present in the database.

241 The dashed lines in (c,d) mark a ratio of 1 data base entry per 100 estimated species.

242 Abbreviations: **Am**: tropical monsoon; **Aw**: tropical savanna with dry-winter characteristics;

243 **As**: tropical savanna with dry-summer characteristics; **BSh**: semi-arid (steppe) hot; **Csa**:

244 mediterranean hot summer; **Csb**: mediterranean warm/cool summer; **Cfa**: humid subtropical;

245 **Cfb**: oceanic; **Cwa**: dry-winter humid subtropical; **Dwb**: warm summer continental.

246

247

## 248 **Tables**

249 **Online-only Table 1:** Insect bite force database summary. Taxonomic classification, maximum  
250 bite force per measurement (iBite), specimen and species (ID), regular and geometric mean  
251 bite force per specimen and species, voltage amplification setting, length measurements,  
252 collection coordinates, country, and climate zone for each bite fore measurement.

253

## 254 **References**

- 255 1. Aguirre, L. F., Anthony, H., van Damme, R. & Matthyssen, E. Ecomorphological analysis of  
256 trophic niche partitioning in a tropical savannah bat community. *Proc. R. Soc. Lond. B Biol.*  
257 *Sci.* **269**, 1271–1278 (2002).
- 258 2. Huyghe, K., Vanhooydonck, B., Scheers, H., Molina-Borja, M. & Van Damme, R.  
259 Morphology, performance and fighting capacity in male lizards, *Gallotia galloti*. *Funct.*  
260 *Ecol.* **19**, 800–807 (2005).
- 261 3. Lappin, A. K. & Husak, J. F. Weapon performance, not size, determines mating success and  
262 potential reproductive output in the collared lizard (*Crotaphytus collaris*). *Am. Nat.* **166**,  
263 426–436 (2005).
- 264 4. Husak, J. F., Lappin, A. K., Fox, S. F. & Lemos-Espinal, J. A. Bite-Force Performance Predicts  
265 Dominance in Male Venerable Collared Lizards (*Crotaphytus antiquus*). *Copeia* **2006**, 301–  
266 306 (2006).
- 267 5. Meyers, J. J., Nishikawa, K. C. & Herrel, A. The evolution of bite force in horned lizards: the  
268 influence of dietary specialization. *J. Anat.* **232**, 214–226 (2018).
- 269 6. Huber, D. R., Eason, T. G., Hueter, R. E. & Motta, P. J. Analysis of the bite force and  
270 mechanical design of the feeding mechanism of the durophagous horn shark  
271 *Heterodontus francisci*. *J. Exp. Biol.* **208**, 3553–3571 (2005).
- 272 7. Grubich, J. R., Huskey, S., Crofts, S., Orti, G. & Porto, J. Mega-Bites: Extreme jaw forces of  
273 living and extinct piranhas (Serrasalminae). *Sci. Rep.* **2**, 1009 (2012).
- 274 8. Erickson, G. M. *et al.* Insights into the Ecology and Evolutionary Success of Crocodylians  
275 Revealed through Bite-Force and Tooth-Pressure Experimentation. *PLOS ONE* **7**, e31781  
276 (2012).
- 277 9. Herrel, A., Podos, J., Huber, S. K. & Hendry, A. P. Evolution of bite force in Darwin’s finches:  
278 a key role for head width. *J. Evol. Biol.* **18**, 669–675 (2005).



- 279 10. Herrel, A., O'Reilly, J. C. & Richmond, A. M. Evolution of bite performance in turtles. *J. Evol.*  
280 *Biol.* **15**, 1083–1094 (2002).
- 281 11. Herrel, A., Grauw, E. D. & Lemos-Espinal, J. A. Head shape and bite performance in  
282 xenosaurid lizards. *J. Exp. Zool.* **290**, 101–107 (2001).
- 283 12. Jones, M. E. H. *et al.* Reproductive phenotype predicts adult bite-force performance in  
284 sex-reversed dragons (*Pogona vitticeps*). *J. Exp. Zool. Part Ecol. Integr. Physiol.* **333**, 252–  
285 263 (2020).
- 286 13. Lappin, A. K. *et al.* Bite force in the horned frog (*Ceratophrys cranwelli*) with implications  
287 for extinct giant frogs. *Sci. Rep.* **7**, 11963 (2017).
- 288 14. Thomason, J. J., Russell, A. P. & Morgeli, M. Forces of biting, body size, and masticatory  
289 muscle tension in the opossum *Didelphis virginiana*. *Can. J. Zool.* **68**, 318–324 (1990).
- 290 15. Wroe, S., Colin, M. & Jeffrey, T. Bite club: comparative bite force in big biting mammals  
291 and the prediction of predatory behaviour in fossil taxa. *Proc. R. Soc. B Biol. Sci.* **272**, 619–  
292 625 (2005).
- 293 16. Christiansen, P. & Wroe, S. Bite Forces and Evolutionary Adaptations to Feeding Ecology  
294 in Carnivores. *Ecology* **88**, 347–358 (2007).
- 295 17. Santana, S. E. & Dumont, E. R. Connecting behaviour and performance: the evolution of  
296 biting behaviour and bite performance in bats. *J. Evol. Biol.* **22**, 2131–2145 (2009).
- 297 18. Sakamoto, M., Lloyd, G. T. & Benton, M. J. Phylogenetically structured variance in felid  
298 bite force: the role of phylogeny in the evolution of biting performance. *J. Evol. Biol.* **23**,  
299 463–478 (2010).
- 300 19. Labandeira, C. C. Insect mouthparts: Ascertaining the paleobiology of insect feeding  
301 strategies. *Annu. Rev. Ecol. Syst.* **28**, 153–193 (1997).
- 302 20. Zhang, Z.-Q. Animal Biodiversity: An Outline of Higher-Level Classification and Survey of  
303 Taxonomic Richness. *Zootaxa* **3148**, 1–237 (2011).

- 304 21. David, S., Funken, J., Potthast, W. & Blanke, A. Musculoskeletal modeling of the dragonfly  
305 mandible system as an aid to understanding the role of single muscles in an evolutionary  
306 context. *J. Exp. Biol.* jeb.132399 (2016) doi:10.1242/jeb.132399.
- 307 22. David, S., Funken, J., Potthast, W. & Blanke, A. Musculoskeletal modelling under an  
308 evolutionary perspective: deciphering the role of single muscle regions in closely related  
309 insects. *J. R. Soc. Interface* **13**, 20160675 (2016).
- 310 23. Weihmann, T., Reinhardt, L., Weißing, K., Siebert, T. & Wipfler, B. Fast and Powerful:  
311 Biomechanics and Bite Forces of the Mandibles in the American Cockroach *Periplaneta*  
312 *americana*. *PLoS ONE* **10**, e0141226 (2015).
- 313 24. Wheeler, C. P. & Evans, M. E. G. The mandibular forces and pressures of some predacious  
314 Coleoptera. *J. Insect Physiol.* **35**, 815–820 (1989).
- 315 25. Goyens, J., Dirckx, J., Dierick, M., Van Hoorebeke, L. & Aerts, P. Biomechanical  
316 determinants of bite force dimorphism in *Cyclommatus metallifer* stag beetles. *J. Exp. Biol.*  
317 **217**, 1065–1071 (2014).
- 318 26. Grimaldi, D. A. & Engel, M. S. *Evolution of the Insects*. (Cambridge University Press, 2005).
- 319 27. Rühr, P. T. & Blanke, A. forceX and forceR: a mobile setup and R package to measure and  
320 analyse a wide range of animal closing forces. (in review).
- 321 28. Herrel, A., Spithoven, L., van Damme, R. & de Vree, F. Sexual dimorphism of head size in  
322 *Gallotia galloti*: testing the niche divergence hypothesis by functional analyses. *Funct.*  
323 *Ecol.* **13**, 289–297 (1999).
- 324 29. Gomes, V., Herrel, A., Carretero, M. A. & Kaliontzopoulou, A. New Insights into Bite  
325 Performance: Morphological Trade-Offs Underlying the Duration and Magnitude of Bite  
326 Force. *Physiol. Biochem. Zool.* **93**, 175–184 (2020).

- 327 30. Lappin, A. K. & Jones, M. E. H. Reliable quantification of bite-force performance requires  
328 use of appropriate biting substrate and standardization of bite out-lever. *J. Exp. Biol.*  
329 *jeb.106385* (2014) doi:10.1242/jeb.106385.
- 330 31. R Core Team. *R: A language and environment for statistical computing*. R Foundation for  
331 *Statistical Computing*. (R Foundation for Statistical Computing, 2021).
- 332 32. Wickham, H., François, R., Henry, L., Müller, K. & RStudio. *dplyr: A Grammar of Data*  
333 *Manipulation*. (2021).
- 334 33. Wickham, H. *et al.* *ggplot2: Create Elegant Data Visualisations Using the Grammar of*  
335 *Graphics*. (2021).
- 336 34. Attali, D. & Baker, C. *ggExtra: Add Marginal Histograms to 'ggplot2', and More 'ggplot2'*  
337 *Enhancements*. (2019).
- 338 35. Sakamoto, M., Ruta, M. & Venditti, C. Extreme and rapid bursts of functional adaptations  
339 shape bite force in amniotes. *Proc. R. Soc. B Biol. Sci.* **286**, 20181932 (2019).
- 340 36. Köppen, W. Das geographische System der Klimate. in *Handbuch der Klimatologie* (ed.  
341 Geiger, R.) 5–44 (Borntraeger, 1936).
- 342 37. Rubel, F. & Kottek, M. Observed and projected climate shifts 1901–2100 depicted by world  
343 maps of the Köppen-Geiger climate classification. *Meteorol. Z.* 135–141 (2010)  
344 doi:10.1127/0941-2948/2010/0430.
- 345 38. Rubel, F., Brugger, K., Haslinger, K. & Auer, I. The climate of the European Alps: Shift of  
346 very high resolution Köppen-Geiger climate zones 1800–2100. *Meteorol. Z.* 115–125  
347 (2017) doi:10.1127/metz/2016/0816.
- 348 39. Bryant, C., Wheeler, N. R., Rubel, F. & French, R. H. *kgc: Koeppen-Geiger Climatic Zones*.  
349 (2017).
- 350 40. Hinchliff, C. E. *et al.* Synthesis of phylogeny and taxonomy into a comprehensive tree of  
351 life. *Proc. Natl. Acad. Sci.* **112**, 12764–12769 (2015).

- 352 41. Michonneau, F., Brown, J. W. & Winter, D. J. rotl: an R package to interact with the Open  
353 Tree of Life data. *Methods Ecol. Evol.* **7**, 1476–1481 (2016).
- 354 42. Snodgrass, R. E. Facts and theories concerning the insect head. *Smithson. Misc. Collect.*  
355 **142**, 1–61 (1960).
- 356 43. Snodgrass, R. E. *Insects, their ways and means of living*. (Smithsonian Institution, 1930).  
357
